# Supplementary material for: Identification of Natural Compound Carnosol as a Novel TRPA1 Receptor Agonist
Source: PubMed Central journal article supplement (PMC6271858; doi:10.3390/molecules191118733), 2014-11-14
Supplement: molecules-19-18733-s001.pdf [file molecules-19-18733-s001.pdf]

# Supplementary Materials

**Table S1.** Compound information and their medicinal plants.

| No. | Constituent               | PubChem<br>CID | Medicinal Plant                                             |
|-----|---------------------------|----------------|-------------------------------------------------------------|
| 1   | Catechin                  | 9064           | <i>Acacia catehu</i> (L.f.) Willd.                          |
| 2   | Epicatechin               | 72,276         | <i>Acacia catehu</i> (L.f.) Willd.                          |
| 3   | sesamin                   | 72,307         | <i>Acanthopanax gracilistylus</i> W. W. Smith               |
| 4   | Eleutheroside E           | 3,084,742      | <i>Acanthopanax senticosus</i> (Rupr.et Maxim.) Harms       |
| 5   | Ciwujianoside B           | 71,571,445     | <i>Acanthopanax senticosus</i> (Rupr.et Maxim.) Harms       |
| 6   | hyaconitine               | 23,337         | <i>Aconitum carmichaeli</i> Debx.                           |
| 7   | Mesaconitine              | 416,228        | <i>Aconitum carmichaeli</i> Debx.                           |
| 8   | Lappaconitine             | 3886           | <i>Aconitum carmichaelii</i> Debx.                          |
| 9   | 8-O-Acetylharpagide       | 5,459,146      | <i>Ajuga ciliata</i> Bunge.                                 |
| 10  | Calceolarioside B         | 5,273,567      | <i>Akebia quinata</i> (Thunb.) Decne.                       |
| 11  | Cardamonin                | 641,785        | <i>Alpinia katsumadai</i> Hayata                            |
| 12  | Andrographolide           | 5,318,517      | <i>Andrographis paniculata</i> (Burm.f.) Nees               |
| 13  | mangiferin                | 5,281,647      | <i>Anemarrhena asphodeloides</i> Bge.                       |
| 14  | Isoimperatorin            | 68,081         | <i>Angelica dahurica</i> (Fisch. Ex Hoffm) Benth. et Hook.f |
| 15  | Imperatorin               | 10,212         | <i>Angelica dahurica</i> (Fisch. Ex Hoffm) Benth. et Hook.f |
| 16  | Byakangelicin             | 10,211         | <i>Angelica sinensis</i> (Oliv.) Diels                      |
| 17  | Columbianadin             | 6,436,246      | <i>Angelica sinensis</i> (Oliv.) Diels                      |
| 18  | Succinic acid             | 1110           | <i>Angelica sinensis</i> (Oliv.) Diels                      |
| 19  | Notoginsenoside R1        | 441,934        | <i>Angelica sinensis</i> (Oliv.) Diels                      |
| 20  | Arctigenin                | 64,981         | <i>Arctium lappa</i> L.                                     |
| 21  | Arctiin                   | 100,528        | <i>Arctium lappa</i> L.                                     |
| 22  | Aristolochic Acid I       | 2236           | <i>Aristolochia manshuriensis</i> Kom.                      |
| 23  | Artemisinin               | 2240           | <i>Artemisia annua</i> L.                                   |
| 24  | Astragaloside             | 45,006,101     | <i>Astragalus membranaceus</i> (Fisch.) Bge                 |
| 25  | Folic acid                | 6037           | <i>Astragalus membranaceus</i> (Fisch.) Bge                 |
| 26  | Betaine                   | 247            | <i>Astragalus membranaceus</i> (Fisch.) Bge                 |
| 27  | Atractylenolide I         | 5,321,018      | <i>Atractylodes macrocephala</i> Koidz.                     |
| 28  | Atractylenolide III       | 155,948        | <i>Atractylodes macrocephala</i> Koidz.                     |
| 29  | Atractylenolide II        | 14,448,070     | <i>Atractylodes macrocephala</i> Koidz.                     |
| 30  | Oleuropein                | 5,281,544      | <i>Canavium album</i> Raeuseh                               |
| 31  | Hydroxysafflor yellow A   | 6,443,665      | <i>Carthamus tinctorius</i> L.                              |
| 32  | Crocin                    | 5,281,233      | <i>Carthamus tinctorius</i> L.                              |
| 33  | Tracheloside              | 169,511        | <i>Carthamus tinctorius</i> L.                              |
| 34  | asiaticoside              | 108,062        | <i>Centella asiatica</i> (L.)Urb.                           |
| 35  | Isoferulic acid           | 736,186        | <i>Cimicifuga heracleifolia</i> Kom.                        |
| 36  | Neohesperidin             | 442,439        | <i>Citrus aurantium</i> L.                                  |
| 37  | Nobiletin                 | 72,344         | <i>Citrus aurantium</i> L.                                  |
| 38  | Limonin                   | 179,651        | <i>Citrus aurantium</i> L.                                  |
| 39  | Rutin                     | 5,280,805      | <i>Citrus aurantium</i> L.                                  |
| 40  | Hesperidin                | 10,621         | <i>Citrus aurantium</i> L.                                  |
| 41  | naringin                  | 442,428        | <i>Citrus aurantium</i> L.                                  |
| 42  | Coptisine                 | 72,322         | <i>Coptis chinensis</i> Franch.                             |
| 43  | Berbamine dihydrochloride | 56,845,155     | <i>Coptis chinensis</i> Franch.                             |

Table S1. Cont.

| No. | Constituent                     | PubChem<br>CID | Medicinal Plant                             |
|-----|---------------------------------|----------------|---------------------------------------------|
| 44  | berbamine                       | 10,170         | <i>Coptis chinensis</i> Franch.             |
| 45  | Loganin                         | 87,691         | <i>Cornus officinalis</i> Sieb. et Zucc.    |
| 46  | Tetrahydropalmatine             | 72,301         | <i>Corydalis yanhusuo</i> W. T. Wang        |
| 47  | Hyperoside                      | 5,281,643      | <i>Crataegus pinnatifida</i> Bge.           |
| 48  | Protopine                       | 4970           | <i>Daphne genkwa</i> Sieb. et Zucc.         |
| 49  | Genkwanin                       | 5,281,617      | <i>Daphne genkwa</i> Sieb. et Zucc.         |
| 50  | Ephedrine Hydrochloride         | 65,326         | <i>Ephedra sinica</i> Stapf                 |
| 51  | Icariin                         | 5,471,129      | <i>Epimedium brevicornu</i> Maxim.          |
| 52  | Chlorogenic acid                | 1,794,427      | <i>Eucommia ulmoides</i> Oliv.              |
| 53  | Eugenol                         | 3314           | <i>Eugenia caryophyllata</i> Thunb.         |
| 54  | Phillyrin                       | 44,584,288     | <i>Forsythia suspensa</i> (Thunb.) Vahl     |
| 55  | Forsythoside B                  | 44,429,859     | <i>Forsythia suspensa</i> (Thunb.) Vahl     |
| 56  | Esculin hydrate                 | 44,134,702     | <i>Fraxinus rhychophylla</i> Hance          |
| 57  | fraxetin                        | 5,273,569      | <i>Fraxinus rhychophylla</i> Hance          |
| 58  | Peimine                         | 131,900        | <i>Fritillaria cirrhosa</i> D. Don          |
| 59  | Peiminine                       | 167,691        | <i>Fritillaria cirrhosa</i> D. Don          |
| 60  | Sipeimine                       | 442,977        | <i>Fritillaria cirrhosa</i> D. Don          |
| 61  | Gardenoside                     | 442,423        | <i>Gardenia jasminoides</i> Ellis           |
| 62  | Genipin                         | 442,424        | <i>Gardenia jasminoides</i> Ellis           |
| 63  | Geniposidic acid                | 443,354        | <i>Gardenia jasminoides</i> Ellis           |
| 64  | Gentiobiose                     | 441,422        | <i>Gentiana manshurica</i> Kitag.           |
| 65  | gentiopicroside                 | 88,708         | <i>Gentiana manshurica</i> Kitag.           |
| 66  | Ginkgolide B                    | 65,243         | <i>Ginkgo biloba</i> L.                     |
| 67  | Ginkgolide C                    | 16,211,418     | <i>Ginkgo biloba</i> L.                     |
| 68  | Ginkgolide A                    | 9,909,368      | <i>Ginkgo biloba</i> L.                     |
| 69  | Daidzin                         | 107,971        | <i>Glycine max</i> (L.) Merr.               |
| 70  | Genistin                        | 5,281,377      | <i>Glycine max</i> (L.) Merr.               |
| 71  | Liquiritin                      | 503,737        | <i>Glycyrrhiza uralensis</i> Fisch.         |
| 72  | Isoliquiritin                   | 5,318,591      | <i>Glycyrrhiza uralensis</i> Fisch.         |
| 73  | Liquiritigenin                  | 114,829        | <i>Glycyrrhiza uralensis</i> Fisch.         |
| 74  | Glycyrrhizic acid               | 656,656        | <i>Glycyrrhiza uralensis</i> Fisch.         |
| 75  | glycyrrhetic acid               | 10,114         | <i>Glycyrrhiza uralensis</i> Fisch.         |
| 76  | Monoammonium<br>glycyrrhizinate | 62,074         | <i>Glycyrrhiza uralensis</i> Fisch.         |
| 77  | Narcissoside                    | 5,481,663      | <i>Hedyotis chrysotricha</i> (Palib.) Merr. |
| 78  | Isorhamnetin                    | 5,281,654      | <i>Hippophae rhamnoides</i> L.              |
| 79  | Allantoin                       | 204            | <i>Hordeum vulgare</i> L.                   |
| 80  | colchicine                      | 6167           | <i>Iphigenia indica</i> A. Gray             |
| 81  | Ligustrazine HCl                | 156,709        | <i>Ligusticum chuanxiong</i> Hort.          |
| 82  | Senkyunolide A                  | 3,085,257      | <i>Ligusticum chuanxiong</i> Hort.          |
| 83  | ferulic acid                    | 445,858        | <i>Ligusticum chuanxiong</i> Hort.          |
| 84  | neochlorogenic acid             | 5,280,633      | <i>Lonicera japonica</i> Thunb.             |
| 85  | Isochlorogenic acid A           | 6,474,310      | <i>Lonicera japonica</i> Thunb.             |

Table S1. Cont.

| No. | Constituent               | PubChem<br>CID | Medicinal Plant                                    |
|-----|---------------------------|----------------|----------------------------------------------------|
| 86  | Luteoloside               | 5,280,637      | <i>Lonicera japonica</i> Thunb.                    |
| 87  | Isochlorogenic acid C     | 6,474,309      | <i>Lonicera japonica</i> Thunb.                    |
| 88  | 3,4-Dicaffeoylquinic acid | 5,281,780      | <i>Lonicera japonica</i> Thunb.                    |
| 89  | Cryptochlorogenic acid    | 9,798,666      | <i>Lonicera japonica</i> Thunb.                    |
| 90  | Tormentic acid            | 73,193         | <i>Mosla chinensis</i> Maxim.                      |
| 91  | Nardosinone               | 168,136        | <i>Nardostachys chinensis</i> Batal.               |
| 92  | Neferine                  | 159,654        | <i>Nelumbo nucifera</i> Gaertn.                    |
| 93  | Liensinine                | 160,644        | <i>Nelumbo nucifera</i> Gaertn.                    |
| 94  | Isoliensinine             | 5,274,591      | <i>Nelumbo nucifera</i> Gaertn.                    |
| 95  | Liensinine perchlorate    | 71,307,566     | <i>Nelumbo nucifera</i> Gaertn.                    |
| 96  | Ruscogenin                | 441,893        | <i>Ophiopogon japonicus</i> (Thunb.) Ker-Gawl.     |
| 97  | Paeoniflorin              | 442,534        | <i>Paeonia lactiflora</i> Pall.                    |
| 98  | Paeonolum                 | 11,092         | <i>Paeonia suffruticosa</i> Andr.                  |
| 99  | Protopanaxadiol           | 11,213,350     | <i>Panax ginseng</i> C. A. Mey.                    |
| 100 | Protopanaxatriol          | 22,392,424     | <i>Panax ginseng</i> C. A. Mey.                    |
| 101 | Ginsenoside Rb1           | 9,898,279      | <i>Panax ginseng</i> C. A. Mey.                    |
| 102 | Ginsenoside Rg1           | 441,923        | <i>Panax ginseng</i> C. A. Mey.                    |
| 103 | Ginsenoside Re            | 73,149         | <i>Panax ginseng</i> C. A. Mey.                    |
| 104 | Ginsenoside Rg2           | 6,441,009      | <i>Panax ginseng</i> C. A. Mey.                    |
| 105 | Ginsenoside Rh2           | 119,307        | <i>Panax ginseng</i> C. A. Mey.                    |
| 106 | beta-D-Glucopyranoside    | 3,811,495      | <i>Panax ginseng</i> C. A. Mey.                    |
| 107 | Panaxadiol                | 328,778        | <i>Panax ginseng</i> C. A. Mey.                    |
| 108 | panaxotriol               | 93,484         | <i>Panax ginseng</i> C. A. Mey.                    |
| 109 | Perillene                 | 9142           | <i>Perilla frutescens</i> (L.) Britt.              |
| 110 | Patchouli alcohol         | 521,903        | <i>Pogostemon cablin</i> (Blanco) Benth.           |
| 111 | Senegenin                 | 200,662        | <i>Polygala tenuifolia</i> Willd.                  |
| 112 | Amygdalin                 | 656,516        | <i>Prunus armeniaca</i> L. var. <i>ansu</i> Maxim. |
| 113 | Angelicin                 | 10,658         | <i>Psoralea corylifolia</i> L.                     |
| 114 | Puerarin                  | 5,281,807      | <i>Pueraria lobata</i> (Willd.) Ohwi               |
| 115 | Catalpol                  | 91,520         | <i>Rehmannia glutinosa</i> Libosch.                |
| 116 | Polydatin                 | 5,281,718      | <i>Reynoutria japonica</i> Houtt.                  |
| 117 | Aloe emodin               | 10,207         | <i>Rheum palmatum</i> L.                           |
| 118 | Sennoside A               | 73,111         | <i>Rheum palmatum</i> L.                           |
| 119 | Sennoside B               | 91,440         | <i>Rheum palmatum</i> L.                           |
| 120 | Physcion                  | 10,639         | <i>Rheum palmatum</i> L.                           |
| 121 | Emodin                    | 3220           | <i>Rheum palmatum</i> L.                           |
| 122 | Chrysophanol              | 10,208         | <i>Rheum palmatum</i> L.                           |
| 123 | Pyrogallic Acid           | 1057           | <i>Rhus chinensis</i> Mill.                        |
| 124 | Purpurin                  | 6683           | <i>Rubia cordifolia</i> L.                         |
| 125 | Protocatechuic acid       | 72             | <i>Salvia miltiorrhiza</i> Bge.                    |
| 126 | Tanshinone II A           | 164,676        | <i>Salvia miltiorrhiza</i> Bge.                    |
| 127 | Lithospermic acid         | 6,441,498      | <i>Salvia miltiorrhiza</i> Bge.                    |
| 128 | Caffeic acid              | 689,043        | <i>Salvia miltiorrhiza</i> Bge.                    |

Table S1. Cont.

| No. | Constituent            | PubChem<br>CID | Medicinal Plant                                                           |
|-----|------------------------|----------------|---------------------------------------------------------------------------|
| 129 | Salvianolic acid A     | 5,281,793      | <i>Salvia miltiorrhiza</i> Bge.                                           |
| 130 | Salvianolic acid B     | 6,441,188      | <i>Salvia miltiorrhiza</i> Bge.                                           |
| 131 | Tanshinone I           | 114,917        | <i>Salvia miltiorrhiza</i> Bge.                                           |
| 132 | Cryptotanshinone       | 160,254        | <i>Salvia miltiorrhiza</i> Bge.                                           |
| 133 | Carnosol               | 2579           | <i>Salvia officinalis</i> L.                                              |
| 134 | Ursolic acid           | 64,945         | <i>Salvia officinalis</i> L.                                              |
| 135 | Carnosic acid          | 65,126         | <i>Salvia officinalis</i> L.                                              |
| 136 | Schisantherin A        | 151,529        | <i>Schisandra chinensis</i> (Turcz.)                                      |
| 137 | Schizandrin B          | 108,130        | <i>Schisandra chinensis</i> (Turcz.)                                      |
| 138 | Schisandrin            | 3,001,664      | <i>Schisandra chinensis</i> (Turcz.)                                      |
| 139 | schisandrin C          | 119,112        | <i>Schisandra chinensis</i> (Turcz.)                                      |
| 140 | Schizandrol B          | 68,781         | <i>Schisandra chinensis</i> (Turcz.)                                      |
| 141 | Baicalin               | 64,982         | <i>Scutellaria baicalensis</i> Georgi                                     |
| 142 | Wogonin                | 5,281,703      | <i>Scutellaria baicalensis</i> Georgi                                     |
| 143 | scutellarin            | 185,617        | <i>Scutellaria baicalensis</i> Georgi                                     |
| 144 | Sesamolin              | 101,746        | <i>Sesamum indicum</i> L.                                                 |
| 145 | Sinomenine             | 5,459,308      | <i>Sinomenium acutum</i> (Thunb.) Rehd. Et Wils.                          |
| 146 | Astilbin               | 119,258        | <i>Smilax glabra</i> Roxb.                                                |
| 147 | quercetin-3-rhamnoside | 5,280,459      | <i>Sophora japonica</i> L.                                                |
| 148 | Tetrandrine            | 73,078         | <i>Stephania tetrandra</i> S. Moore                                       |
| 149 | Fangchinoline          | 73,481         | <i>Stephania tetrandra</i> S. Moore                                       |
| 150 | Triptolide             | 107,985        | <i>Tripterygium wilfordii</i> Hook. f.                                    |
| 151 | Dhydrodiisoeugenol     | 5,379,033      | <i>Vaccaria segetalis</i> (Neck.) Garcke.                                 |
| 152 | 6-Gingerol             | 442,793        | <i>Zingiber officinale</i> Rosc.                                          |
| 153 | Bisdemethoxycurcumin   | 5,315,472      | <i>Zingiber officinale</i> Rosc.                                          |
| 154 | curcumenol             | 387,977        | <i>Zingiber officinale</i> Rosc.                                          |
| 155 | Borneol                | 64,685         | <i>Zingiber officinale</i> Rosc.                                          |
| 156 | Betulinic acid         | 64,971         | <i>Ziziphus jujuba</i> Mill.var. <i>spinosa</i><br>(Bunge) Hu ex H.F.Chow |
| 157 | Betulin                | 72,326         | <i>Ziziphus jujuba</i> Mill.var. <i>spinosa</i><br>(Bunge) Hu ex H.F.Chow |
| 158 | Jujuboside A           | 171,446        | <i>Ziziphus jujuba</i> Mill.var. <i>spinosa</i><br>(Bunge) Hu ex H.F.Chow |
